# Supplementary material for: RNASeq Analysis of a Pax3-Expressing Myoblast Clone in-Vitro and Effect of Culture Surface Stiffness on Differentiation
Source: Research Square preprint supplement (doi:10.21203/rs.3.rs-871095/v1), 2021-09-20
Supplement: Supplementary file 1 [file 637465fba0727ff6778d7001.docx]

Supplementary Information

**RNASeq analysis of a Pax3-expressing myoblast clone *in-vitro* and effect of culture surface stiffness on differentiation.**

Louise Richardson1, Dapeng Wang2,3, Ruth Hughes1, Colin A Johnson4 and Michelle Peckham1*

1School of Molecular and Cellular Biology, University of Leeds, UK

2LeedsOmics, University of Leeds, Leeds, LS2 9JT, United Kingdom,

3Wellcome Centre for Human Genetics, University of Oxford, Oxford, OX3 7BN, United Kingdom,

4Leeds Institute of Medical Research, Faculty of Medicine and Health, University of Leeds, Leeds, UK

Supplemental Fig. S1





Supplemental Figure S1: Pattern analysis of RNA expression in cells on soft and hard surfaces. The analysis was performed using DegPatterns (see methods).
